# Supplementary material for: Employment of single-diode model to elucidate the variations in photovoltaic parameters under different electrical and thermal conditions
Source: PLoS One. 2017 Aug 9;12(8):e0182925. doi: 10.1371/journal.pone.0182925 (PMC5549970; doi:10.1371/journal.pone.0182925)
Supplement: S1 Table — (XLSX) [file pone.0182925.s001.xlsx]

## Sheet: Rs, Rp changed
Voc for 5%	Rs changed	Isc for 5% (Voc = 0.68V)	Isc for 10% (Voc = 0.73V)	Isc for 15% (Voc=0.77)			Isc for 5%	Isc for 10%	Isc for 15%	Rp changed	Voc for 5%	Voc for 10%	Voc for 15%
0.68	0.2	19.96	29.94	39.92			18.17	27.26	36.35	20	0.388	0.534	0.63
0.68	0.4	19.92	29.88	39.84			19.04	28.56	38.07	40	0.581	0.674	0.725
0.68	0.6	19.88	29.82	39.76			19.35	29.02	38.69	60	0.636	0.705	0.748
0.68	0.8	19.84	29.76	39.68			19.5	29.25	39	80	0.661	0.721	0.759
0.68	1	19.8	29.7	39.59			19.6	29.4	39.19	100	0.675	0.73	0.765
0.68	2	19.6	29.4	39.19			19.66	29.49	39.32	120	0.69	0.74	0.77
0.68	4	19.21	28.81	38.4			19.71	29.56	39.41	140	0.692	0.746	0.775
0.68	6	18.83	28.22	37.59			19.74	29.61	39.48	160	0.697	0.748	0.777
0.68	8	18.46	27.64	36.74			19.77	29.66	39.54	180	0.699	0.749	0.779
0.68	10	18.1	27.04	35.81			19.87	29.69	39.58	200	0.705	0.75	0.78
0.68	12	17.74	26.42	34.73			19.89	29.84	39.78	400	0.708	0.76	0.79
0.68	14	17.38	25.76	33.49			19.92	29.88	39.84	600	0.71	0.76	0.79
0.68	16	17.02	25.05	32.06			19.94	29.91	39.88	800	0.72	0.76	0.79
0.68	18	16.66	24.29	30.51			19.95	29.92	39.9	1000	0.72	0.76	0.79
0.68	20	16.3	23.47	28.92
0.68	40	12.51	15.58	17.28
0.68	60	9.48	11.08	11.99
0.68	80	7.49	8.54	9.15
0.68	100	6.16	6.93	7.39
		Rp=100 and Rs = 2 Ohms
		Rs changed						Rp changed
Pmx for 5%	FF for 5%	Pmx for 10%	FF for 10%	Pmx for 15%)	FF for 15%	Pmx for 5%	FF for 5%	Pmx for 10%	FF for 10%	Pmx for 15%)	FF for 15%
6.29	0.463427	11.24	0.514271	16.6	0.540041	1.79	0.253902	3.98	0.273411	6.9	0.301303
6.25	0.461404	11.15	0.511177	16.42	0.535258	3.52	0.3182	7.17	0.372478	11.33	0.410496
6.22	0.460114	11.06	0.508071	16.25	0.530782	4.71	0.382721	8.87	0.433548	13.31	0.459915
6.18	0.458076	10.97	0.504953	16.07	0.525961	5.47	0.424376	9.83	0.466114	14.38	0.485794
6.14	0.456031	10.88	0.501822	15.9	0.52158	5.97	0.451247	10.43	0.485975	15.05	0.501995
5.97	0.447929	10.43	0.485975	15.05	0.498736	6.32	0.465891	10.85	0.497191	15.5	0.51195
5.64	0.43176	9.59	0.455987	13.46	0.455222	6.59	0.483162	11.15	0.505629	15.83	0.51829
5.32	0.415482	8.8	0.427172	12.02	0.41528	6.79	0.493503	11.38	0.51381	16.01	0.521907
5.02	0.399911	8.08	0.400452	10.75	0.379996	6.95	0.502922	11.56	0.520361	16.27	0.528218
4.74	0.385115	7.43	0.376408	9.64	0.349609	7.07	0.504699	11.71	0.525879	16.42	0.531867
4.48	0.371377	6.83	0.354132	8.66	0.323834	7.67	0.544662	12.38	0.545894	17.13	0.545087
4.23	0.357916	6.31	0.335553	7.87	0.305189	7.88	0.557158	12.6	0.554851	17.37	0.551891
4.01	0.346478	5.84	0.319361	7.18	0.290851	7.98	0.555834	12.72	0.559573	17.49	0.555146
3.79	0.334546	5.43	0.306231	6.58	0.280087	8.04	0.559733	12.77	0.561585	17.56	0.557089
3.6	0.324792	5.06	0.295335	6.07	0.272584
2.29	0.269196	2.93	0.257619	3.36	0.252525
1.65	0.255957	2.04	0.252213	2.31	0.250209
1.28	0.251315	1.57	0.251837	1.77	0.251224
1.01	0.241119	1.27	0.251043	1.42	0.249547

## Sheet: n and T changed
T	Isc for 5%	Isc for 10%	Isc for 15%	Voc for %	Voc for 10%	Voc for 15%			Isc for 5%	Isc for 10%	Isc for 15%	n	Voc for 6%	Voc for 10%	Voc for 15%
25	19.59	29.39	39.19	0.688	0.732	0.781			19.59	29.4	39.19	1	0.517	0.525	0.572
50	20.84	30.64	40.44	0.612	0.663	0.73						1.2	0.554	0.565	0.614
100	23.34	33.14	42.94	0.462	0.539	0.637						1.4	0.592	0.606	0.654
150	25.6	35.64	45.44	0.329	0.433	0.567						1.6	0.632	0.647	0.7
200	28.34	38.14	47.94	0.251	0.362	0.523						1.8	0.668	0.687	0.738
250	30.84	40.64	50.44	0.204	0.331	0.514						2	0.706	0.726	0.784
Rp = 100 and Rs = 2 Ohms
		T varied								n Varied
Pmx for 5%	FF for 5%	Pmx for 10%	FF for 10%	Pmx for 15%)	FF or 15%			Pmx for 5%	FF for 5%	Pmx (10%	FF (10%	Pmx (15%)	FF (15%
5.63	0.41772	10.36	0.481559	14.53	0.474722			5.84	0.576618	9.34	0.605118	13.92	0.620966
5.45	0.427314	9.73	0.478972	13.97	0.473219			6.22	0.573121	10	0.602011	14.88	0.618385
4.48	0.415466	8.06	0.451226	12.52	0.457723			6.59	0.568237	10.66	0.598325	15.82	0.617239
3.17	0.376377	6.41	0.415367	11.19	0.434319			6.94	0.560542	11.3	0.594055	16.76	0.610943
2.44	0.343017	5.29	0.383148	10.55	0.420778			7.3	0.557843	11.94	0.591153	17.67	0.610949
2.03	0.322665	4.91	0.365006	10.5	0.404996			7.64	0.552401	12.56	0.588445	18.6	0.605371

## Sheet: Eg vs T change
									Eg	Eff%
	model parameter	m=	5e-05	when Rs, Rp are changed					1.6	5
			0.000347	when T, n are changed					1.4	10
									1.2	15

## Sheet: Efficiency spectrum
Rs vs. Efficiency					Rp vs. Efficiency					T vs. Efficiency					n vs. Efficiency
Rs	Eg1	Eg2	Eg3		Rp	Eg1	Eg2	Eg3		T	Eg1	Eg2	Eg3		n	Eg1	Eg2	Eg3
0.2	6.29	11.24	16.6		20	1.79	3.98	6.9		25	5.53	10.11	14.53		1	5.84	9.34	13.92
0.4	6.25	11.15	16.42		40	3.52	7.17	11.33		50	5.49	9.73	13.97		1.2	6.22	10	14.88
0.6	6.22	11.06	16.25		60	4.71	8.87	13.31		100	4.48	8.06	12.52		1.4	6.59	10.66	15.82
0.8	6.18	10.97	16.07		80	5.47	9.83	14.38		150	3.17	6.41	11.19		1.6	6.94	11.3	16.76
1	6.14	10.88	15.9		100	5.97	10.43	15.05		200	2.44	5.29	10.55		1.8	7.3	11.94	17.67
2	5.97	10.43	15.05		120	6.32	10.85	15.5		250	2.03	4.91	10.45		2	7.64	12.56	18.6
4	5.64	9.59	13.46		140	6.59	11.15	15.83
6	5.32	8.8	12.02		160	6.79	11.38	16.01
8	5.02	8.08	10.75		180	6.95	11.56	16.27
10	4.74	7.43	9.64		200	7.07	11.71	16.42
12	4.48	6.83	8.66		400	7.67	12.38	17.13
14	4.23	6.31	7.87		600	7.88	12.6	17.37
16	4.01	5.84	7.18		800	7.98	12.72	17.49
18	3.79	5.43	6.58		1000	8.04	12.77	17.56
20	3.6	5.06	6.07
40	2.29	2.93	3.36
60	1.65	2.04	2.31						Eg1>Eg2>Eg3
80	1.28	1.57	1.77
100	1.01	1.27	1.42

## Sheet: Pmax calculator
a=2, b=100	n=2
V/ Volt	I/A	P/W	P w/quadrant change
0	-0.0396	0	0					Pmax	0.0157583
0.00737	-0.03949	-0.000291041	0.000291041
0.01474	-0.03939	-0.000580609	0.000580609
0.02212	-0.03928	-0.000868874	0.000868874
0.02949	-0.03918	-0.00115542	0.00115542
0.03686	-0.03907	-0.00144012	0.00144012
0.04423	-0.03897	-0.00172364	0.00172364
0.0516	-0.03886	-0.00200518	0.00200518
0.05897	-0.03876	-0.00228568	0.00228568
0.06635	-0.03865	-0.00256443	0.00256443
0.07372	-0.03855	-0.00284191	0.00284191
0.08109	-0.03844	-0.0031171	0.0031171
0.08846	-0.03834	-0.00339156	0.00339156
0.09583	-0.03823	-0.00366358	0.00366358
0.1032	-0.03812	-0.00393398	0.00393398
0.11058	-0.03802	-0.00420425	0.00420425
0.11795	-0.03791	-0.00447148	0.00447148
0.12532	-0.03781	-0.00473835	0.00473835
0.13269	-0.0377	-0.00500241	0.00500241
0.14006	-0.0376	-0.00526626	0.00526626
0.14743	-0.03749	-0.00552715	0.00552715
0.15481	-0.03739	-0.00578835	0.00578835
0.16218	-0.03728	-0.00604607	0.00604607
0.16955	-0.03717	-0.00630217	0.00630217
0.17692	-0.03707	-0.00655842	0.00655842
0.18429	-0.03696	-0.00681136	0.00681136
0.19166	-0.03686	-0.00706459	0.00706459
0.19904	-0.03675	-0.00731472	0.00731472
0.20641	-0.03664	-0.00756286	0.00756286
0.21378	-0.03654	-0.00781152	0.00781152
0.22115	-0.03643	-0.00805649	0.00805649
0.22852	-0.03632	-0.00829985	0.00829985
0.23589	-0.03622	-0.00854394	0.00854394
0.24327	-0.03611	-0.00878448	0.00878448
0.25064	-0.036	-0.00902304	0.00902304
0.25801	-0.0359	-0.00926256	0.00926256
0.26538	-0.03579	-0.00949795	0.00949795
0.27275	-0.03568	-0.00973172	0.00973172
0.28012	-0.03557	-0.00996387	0.00996387
0.2875	-0.03546	-0.0101947	0.0101947
0.29487	-0.03535	-0.0104237	0.0104237
0.30224	-0.03524	-0.0106509	0.0106509
0.30961	-0.03513	-0.0108766	0.0108766
0.31698	-0.03502	-0.0111006	0.0111006
0.32435	-0.03491	-0.0113231	0.0113231
0.33173	-0.03479	-0.0115409	0.0115409
0.3391	-0.03468	-0.01176	0.01176
0.34647	-0.03456	-0.011974	0.011974
0.35384	-0.03444	-0.0121862	0.0121862
0.36121	-0.03432	-0.0123967	0.0123967
0.36858	-0.0342	-0.0126054	0.0126054
0.37596	-0.03408	-0.0128127	0.0128127
0.38333	-0.03395	-0.0130141	0.0130141
0.3907	-0.03382	-0.0132135	0.0132135
0.39807	-0.03369	-0.013411	0.013411
0.40544	-0.03355	-0.0136025	0.0136025
0.41282	-0.03341	-0.0137923	0.0137923
0.42019	-0.03327	-0.0139797	0.0139797
0.42756	-0.03312	-0.0141608	0.0141608
0.43493	-0.03296	-0.0143353	0.0143353
0.4423	-0.03279	-0.014503	0.014503
0.44967	-0.03262	-0.0146682	0.0146682
0.45705	-0.03244	-0.0148267	0.0148267
0.46442	-0.03224	-0.0149729	0.0149729
0.47179	-0.03204	-0.0151162	0.0151162
0.47916	-0.03182	-0.0152469	0.0152469
0.48653	-0.03158	-0.0153646	0.0153646
0.4939	-0.03133	-0.0154739	0.0154739
0.50128	-0.03105	-0.0155647	0.0155647
0.50865	-0.03076	-0.0156461	0.0156461
0.51602	-0.03043	-0.0157025	0.0157025
0.52339	-0.03008	-0.0157436	0.0157436
0.53076	-0.02969	-0.0157583	0.0157583
0.53813	-0.02926	-0.0157457	0.0157457
0.54551	-0.02879	-0.0157052	0.0157052
0.55288	-0.02826	-0.0156244	0.0156244
0.56025	-0.02768	-0.0155077	0.0155077
0.56762	-0.02703	-0.0153428	0.0153428
0.57499	-0.0263	-0.0151222	0.0151222
0.58236	-0.02549	-0.0148444	0.0148444
0.58974	-0.02458	-0.0144958	0.0144958
0.59711	-0.02356	-0.0140679	0.0140679
0.60448	-0.02242	-0.0135524	0.0135524
0.61185	-0.02112	-0.0129223	0.0129223
0.61922	-0.01967	-0.0121801	0.0121801
0.62659	-0.01802	-0.0112912	0.0112912
0.63397	-0.01616	-0.010245	0.010245
0.64134	-0.01406	-0.00901724	0.00901724
0.64871	-0.01168	-0.00757693	0.00757693
0.65608	-0.00899	-0.00589816	0.00589816
0.66345	-0.00593	-0.00393426	0.00393426
0.67082	-0.00247	-0.00165693	0.00165693
0.6782	0.00146	0.000990172	-0.000990172
0.68557	0.00593	0.00406543	-0.00406543
0.69294	0.01099	0.00761541	-0.00761541
0.70031	0.01675	0.0117302	-0.0117302
0.70768	0.02329	0.0164819	-0.0164819
0.71505	0.03073	0.0219735	-0.0219735
0.72243	0.03918	0.0283048	-0.0283048
0.7298	0.04879	0.0356069	-0.0356069
